# Supplementary material for: Design of a Custom RT-qPCR Array for Assignment of Abiotic Stress Tolerance in Traditional Portuguese Grapevine Varieties
Source: Front Plant Sci. 2017 Oct 25;8:1835. doi: 10.3389/fpls.2017.01835 (PMC5660995; doi:10.3389/fpls.2017.01835)
Supplement: Supplementary file 2 [file Table_2.XLSX]

## Sheet: Table S2
Table S2 │ List and categorization of signiﬁcant unigenes differentially expressed in response to water stress (WS), light stress (LS), heat stress (HS) and field water stress (FS) in ‘Touriga Nacional’ (TN, light green) and ‘Tricadeira’ (TR, light blue). These DEGs were significantly up- or down-regulated (Code UP or DOWN) in each stress treatment as obtained through the use of the 23K custom-ma…
		Code	NCBI accession	NCBI description	BINCODE	NAME	IDENTIFIER	DESCRIPTION
TR	WS	UP1	XM_002269059	Expansin beta 1 precursor	3.2	Cell wall metabolism.Cell wall modification	VVTU12613_at	O23547 expansin-like B1 precursor related cluster
		UP2	XM_002268661	Vitis vinifera late embryogenesis abundant protein D-29-like (LOC100252810)	4.11	Cellular response overview.Abiotic stress.Drought	VVTU4665_at	P13940 lateembryogenesis abundant protein D-29 related cluster
		UP3	NM_001281292	Dehydrin 1b (LOC100232959)	4.11	Cellular response overview.Abiotic stress.Drought	VVTU35995_s_at	AY634281 Vitis viniferadehydrin mRNA, complete cds.
		UP4	XM_002267889	Small heat shock protein (HSP26.5-P) 26.5 kDa class I	21	Unclassified	VVTU5971_at	Q2V3Y9 Protein At3g03100 related cluster
		UP5	XM_003632994	Isoflavone-7-O-methyltransferase 9-like (LOC100248671)	3.1	Cell wall metabolism.Cell wall biosynthesis	VVTU6973_at	Q8GU24 Orcinol O-methyltransferase related cluster
	LS	UP6	XM_002262690	Vitis vinifera serine/threonine-protein kinase SAPK3-like (LOC100243594)	8.6	Signalling.Protein phosphatase	VVTU9506_at	Q9ZNW3 PK11-C1 related cluster
		UP7	XM_002282733	Vitis vinifera proline dehydrogenase 2, mitochondrial (LOC100254983)	6.12	Amino acid metabolism.Proline metabolism	VVTU7588_at	Q6RUF9 Proline dehydrogenase related cluster
		UP8	XM_002268668	Vitis vinifera probable carboxylesterase 15 (LOC100256389)	21	Unclassified	VVTU37784_at	Q0ZPV4 CXE carboxylesterase related cluster
		UP9	XM_002268532	Vitis vinifera zinc finger protein CONSTANS-LIKE 1 (LOC100241849), transcript variant X1	21	Unclassified	VVTU24679_s_at	Q1SWG0 CCT related cluster
		UP10	NM_001280913.1	ELIP1 (early light-inducible protein), LOC100263179	4.4	Cellular response overview.Abiotic stress.Light	VVTU26995_x_at	P93735 Early light-induced protein related cluster
	HS	UP11	XM_002272382	Small heat shock protein 26a, chloroplastic (LOC100267630)	11.4.1	Protein metabolism and modification.Molecular chaperone.HSP	VVTU4901_at	O81961 Heat shock protein 26 related cluster
		UP12	XM_002270560	Vitis vinifera small heat shock protein (22KDa), chloroplastic (LOC100248906)	11.4.1	Protein metabolism and modification.Molecular chaperone.HSP	VVTU33818_at	O80432 Mitochondrial small Heat shock protein related cluster
		UP13	XM_002279078	Vitis vinifera galactinol synthase 1 (LOC100255485)	5.7	Carbohydrate metabolism.Oligosaccharides	VVTU1997_at	Q1SUV1 Glycosyl transferase, family 8 related cluster
		UP14	XM_002280785	Vitis vinifera 18.1 kDa class I heat shock protein(LOC100263355)	11.4.1	Protein metabolism and modification.Molecular chaperone.HSP	VVTU31985_at	Q6WHC0 Chloroplast small Heat shock protein class I related cluster
	F	UP26	XM_002263340	Vitis vinifera 22.0 kDa class IV heat shock protein (LOC100263588)	11.4.1.1	Protein metabolism and modification.Molecular chaperone.HSP.Co-chaperone HSP	VVTU12597_s_at	P30236 22.0 kDa class IV Heat shock protein precursor related cluster
		UP27	XM_003631215	Vitis vinifera probable nucleoredoxin 1-like (LOC100852822)	4.7	Cellular response overview.Abiotic stress.Oxidative	VVTU9162_x_at	O80763 T13D8.29 protein related cluster
		UP28	XM_002280644	Vitis vinifera 17.3 kDa class II heat shock protein (LOC100268056)	11.4.1	Protein metabolism and modification.Molecular chaperone.HSP	VVTU7414_x_at	Q9XGS6 Cytosolic class II low molecular weight Heat shock protein related cluster
TN	WS	UP15	NM_001281006	Mother of ft (MFT)	5.2	Carbohydrate metabolism.CHO enzymes	VVTU37630_at	Q84XL1 SP2G related cluster
		UP16	XM_002283569	Vitis vinifera late embryogenesis abundant protein (LOC100255606)	4.11	Cellular response overview.Abiotic stress.Drought	VVTU5877_s_at	BN000705 TPA_exp: Vitis vinifera mRNA for Ubiquitin-60S ribosomal L40 fusion protein.
		UP17	XM_002282572	Vitis vinifera probable protein phosphatase 2C 24 (LOC100255251)	8.6	Signalling.Protein phosphatase	VVTU8989_at	Q71QD5 Protein phosphatase 2C related cluster
	LS	UP18	XM_002271425	Vitis vinifera 14 kDa proline-rich protein DC2.15 (LOC100267804)	16.2.6	Regulation overview.Nucleic acid metabolism.mRNA metabolism	VVTU39625_s_at	Q10T25 Retrotransposon protein, putative, Ty1-copia subclass, expressed related cluster
		UP19	XM_002279825	Vitis vinifera high-affinity nitrate transporter 3.1 (LOC100258771)	20	Hypothetical protein	VVTU1811_at	Q8S343 Hypothetical protein upa10 related cluster
		UP20	XM_003631394	Vitis vinifera 14 kDa proline-rich protein DC2.15-like (LOC100257513)	16.2.6	Regulation overview.Nucleic acid metabolism.mRNA metabolism	VVTU16264_at	Q10PA9 Small nuclear ribonucleoprotein Sm D3, putative, expressed related cluster
		UP21	XM_002267471	Vitis vinifera germin-like protein subfamily T member 2 (LOC100262082)	4.10	Cellular response overview.Stress response	VVTU9472_at	Q8H2A6 germin-like protein related cluster
		UP22	XM_002268137	Vitis vinifera gibberellin 2-beta-dioxygenase 8 (LOC100245189)	16.1.1.1	Regulation overview.Hormone.GA.Biosynthesis	VVTU3937_at	Q84RC3 Gibberellin 2-oxidase 1 related cluster
	HS	UP23	XM_002285850	Calcium-binding protein CML44 (LOC100253886)	21	Unclassified	VVTU32865_x_at	UPI0000162E68 Cluster related to UPI0000162E68; F24J8.15 protein
		UP24	XM_003633561	Vitis vinifera chaperone protein DnaJ (LOC100247806)	11.4.1.1	Protein metabolism and modification.Molecular chaperone.HSP.Co-chaperone HSP	VVTU14761_s_at	Q8H2B1 DnaJ-like protein related cluster
		UP25	XM_010666666	Vitis vinifera probable LRR receptor-like serine/threonine-protein kinase At3g47570-like (LOC100854714)	18	Leucine-rich domain protein	VVTU28207_s_at	Q53P83 Leucine Rich Repeat, putative related cluster
	F	UP29	XM_002270386	Vitis vinifera beta-glucosidase 13-like (LOC100264732)	5.2	Carbohydrate metabolism.CHO enzymes	VVTU15242_at	Q1RTS0 Glycoside hydrolase, family 1 related cluster
		UP30	XM_002283357	Vitis vinifera ATP-dependent zinc metalloprotease FTSH 6, chloroplastic (LOC100266289)	11.6.3	Protein metabolism and modification.Proteolysis.Metalloprotease	VVTU39347_at	Q4W5U8 FtsH protease related cluster
		UP31	XM_002277554	chaperone protein dnaJ 11, chloroplastic (LOC100241895)	11.4.1.1	Protein metabolism and modification.Molecular chaperone.HSP.Co-chaperone HSP	VVTU2366_s_at	P93499 DnaJ-like protein related cluster
		UP32	XM_019219767	Vitis vinifera protein ACCELERATED CELL DEATH 6 (LOC100250447), transcript variant X1	4.14	Cellular response overview.Cell growth and death.Programmed cell death	VVTU39166_at	Q6Z6P6 Expressed protein related cluster
TR	WS	DOWN1	XM_002272934	Vitis vinifera GDSL esterase/lipase At4g16230-like (LOC100249332)	3.3	Cell wall metabolism.Structural protein	VVTU7322_at	Q5Z916 Putative proline-rich protein APG related cluster
		DOWN2	XM_002269481	Vitis vinifera expansin-like (LOC100261426)	3.2	Cell wall metabolism.Cell wall modification	VVTU3170_s_at	Q6T5H5 Alpha-expansin 3 related cluster
		DOWN3	XM_002285850	Calcium-binding protein CML44 (LOC100253886)	8.11.1	Signalling.Calcium.Calcium sensors and calcium signalling	VVTU32865_x_at	UPI0000162E68 Cluster related to UPI0000162E68; F24J8.15 protein
		DOWN4	XM_002267378	thiamine thiazole synthase 2 (THI1-2), chloroplastic	26.15	Coenzyme and prosthetic group metabolism.Thiamine	VVTU18059_s_at	O23787 Thiazole biosynthetic enzyme, chloroplast precursor related cluster
		DOWN5	XM_002266305	polygalacturonase 1 beta-like protein 1 (LOC100258559)	3.4	Cell wall metabolism.Related protein	VVTU1273_at	Q40161 Polygalacturonase-1 non-catalytic subunit beta precursor related cluster
	LS	DOWN6	XM_002277463	Vitis vinifera calcium-binding protein CML19 (LOC100247858)	8.11.1	Signalling.Calcium.Calcium sensors and calcium signalling	VVTU7822_at	Q9AXG2 Regulator of gene silencing related cluster
		DOWN7	XM_002281777	Ethylene-responsive transcription factor ERF105 (LOC100242632)	16.1.2.4	Regulation overview.Hormone.Ethylene metabolism.Transcription factor	VVTU16079_s_at	Q6RZW8 Putative ethylene response factor 4 related cluster
		DOWN8	XM_002282905	Vitis vinifera nudix hydrolase 18, mitochondrial (LOC100242429)	30.3	Nucleotide metabolism.Miscellaneous	VVTU21860_at	Nudix hydrolase 18, mitochondrial precursor related cluster
		DOWN9	XM_002271102	BON1-associated protein 2 (BAP2) (LOC100248930)	8.11.1	Signalling.Calcium.Calcium sensors and calcium signalling	VVTU13781_s_at	O80843 Hypothetical protein At2g45760 related cluster
		DOWN10	XM_002283853	Vitis vinifera aspartyl protease AED3 (LOC100252287)	11.6.1	Protein metabolism and modification.Proteolysis.Aspartic protease	VVTU2368_at	Aspartyl aminopeptidase-like protein related cluster
	HS	DOWN11	XM_002285224	Vitis vinifera zinc finger protein ZAT10 (LOC100250659)	36	Zinc finger domain	VVTU3375_at	Q9XEU0 Zinc-finger protein 1 related cluster
		DOWN12	XM_002280995	Vitis vinifera probable WRKY transcription factor 46 (LOC100263619)	16.2.5.20	Regulation overview.Nucleic acid metabolism.Transcription factor.WRKY	VVTU37089_at	Q6R7N3 Putative WRKY transcription factor 30 related cluster
		DOWN13	XM_002280007	Vitis vinifera ethylene-responsive transcription factor ERF025-like (LOC100250412)	16.1.2.4	Regulation overview.Hormone.Ethylene metabolism.Transcription factor	VVTU2797_at	Q9FJ90 Similarity to AP2 domain transcription factor related cluster
		DOWN14	XM_002270545	Ethylene responsive element binding factor 2 (LOC100254640)	16.1.2.4	Regulation overview.Hormone.Ethylene metabolism.Transcription factor	VVTU8172_at	O80337 ethylene-responsive transcription factor 1A related cluster
		DOWN15	NM_001281052	Vitis vinifera hypodontia, autosomal recessive (2) (HYD2)	21	Unclassified	VVTU6000_at	Q3HNF4 related cluster
	F	DOWN25	XM_002269403	Vitis vinifera serine carboxypeptidase-like 7 (LOC100253211)	11.6.5	Protein metabolism and modification.Proteolysis.Serine protease	VVTU1462_at	Q9ZTY8 Glucose acyltransferase related cluster
		DOWN26	XM_002271425	Vitis vinifera 14 kDa proline-rich protein DC2.15 (LOC100267804)	3.3	Cell wall metabolism.Structural protein	VVTU16716_s_at	Q39574 14 kDa polypeptide related cluster
		DOWN27	NM_001280982	Vitis vinifera gibberellin 20-oxidase (LOC100232996)	16.1.1.3	Regulation overview.Hormone.GA.Responsive	VVTU1812_s_at	DQ508817 Vitis vinifera cultivar Cabernet-Sauvignon Gibberellin 20-oxidase mRNA, complete cds.
		DOWN28	XM_002263983	Vitis vinifera chalcone synthase (CHS3)	19.4.1.3	Secondary metabolism.Phenylpropanoids.Flavonoids.Flavonoids	VVTU28131_s_at	O82144 Chalcone synthase related cluster
		DOWN29	XM_002272080	Vitis vinifera serine carboxypeptidase-like 16 (LOC100265220)	11.6.5	Protein metabolism and modification.Proteolysis.Serine protease	VVTU6789_s_at	Q9ZTY8 Glucose acyltransferase related cluster
TN	W	DOWN16	XM_002285874	Vitis vinifera prolyl endopeptidase (LOC100267810), transcript variant X1	11.6.5	Protein metabolism and modification.Proteolysis.Serine protease	VVTU9368_at	Q658B2 Putative prolyl endopeptidase related cluster
	LS	DOWN17	XM_002281249	Vitis vinifera 18.2 kDa class I heat shock protein (LOC100265108)	11.4.1	Protein metabolism and modification.Molecular chaperone.HSP	VVTU6495_at	P27880 18.2 kDa class I Heat shock protein related cluster
		DOWN18	XM_003633976	Vitis vinifera ethylene-responsive transcription factor 5-like (LOC100240781)	16.1.2.4	Regulation overview.Hormone.Ethylene metabolism.Transcription factor	VVTU2359_s_at	Q6RZW8 Putative ethylene response factor 4 related cluster
		DOWN19	XM_002280449	Vitis vinifera 17.3 kDa class II heat shock protein (LOC100261109)	11.4.1	Protein metabolism and modification.Molecular chaperone.HSP	VVTU12996_at	Q9XGS6 Cytosolic class II low molecular weight Heat shock protein related cluster
		DOWN20	XM_002281224	Vitis vinifera 18.2 kDa class I heat shock protein (LOC100259921)	11.4.1	Protein metabolism and modification.Molecular chaperone.HSP	VVTU13743_s_at	P27880 18.2 kDa class I Heat shock protein related cluster
	HS	DOWN21	XM_003635375	Vitis vinifera stem-specific protein TSJT1 (LOC100854489)	4.5	Cellular response overview.Abiotic stress.Mineral	VVTU12803_at	Q9SZS0 Hypothetical protein F27G19.50 related cluster
		DOWN22	XM_002274516	Vitis vinifera probable xyloglucan endotransglucosylase/hydrolase protein 23 (LOC100251303)	4.2	Cellular response overview.Biotic stress	VVTU5584_at	Q8S902 Syringolide-induced protein 19-1-5 related cluster
		DOWN23	XM_002277916	Vitis vinifera protein TIFY 5A (LOC100256656)	21	Unclassified	VVTU17033_s_at	Q1SSA7 ZIM related cluster
		DOWN24	XM_002272684	Vitis vinifera probable WRKY transcription factor 41 (LOC100253577)	16.2.5.20	Regulation overview.Nucleic acid metabolism.Transcription factor.WRKY	VVTU17013_at	Q6R7N3 Putative WRKY transcription factor 30 related cluster
	F	DOWN30	XM_002277526	Abscisic acid receptor PYL4 (LOC100256965)	4.10	Cellular response overview.Stress response	VVTU10996_at	Q1SI34 Pathogenesis-related protein Bet v I family, putative related cluster
		DOWN31	XM_003631687	Vitis vinifera 36.4 kDa proline-rich protein (LOC100233114)	3.3	Cell wall metabolism.Structural protein	VVTU27343_s_at	Q9M616 Proline rich protein 1 related cluster
		DOWN32	XM_003632010	probable pectinesterase/pectinesterase inhibitor 35 (LOC100244703)	3.2	Cell wall metabolism.Cell wall modification	VVTU8209_at	Q9LYT5 Pectinesterase-like protein related cluster
		DOWN33	XM_002283203	Vitis vinifera zinc transporter 2 (LOC100255358)	14.4	Transport Overview.Heavy metal ion transport	VVTU39694_at	Q9AWG7 Zinc transporter related cluster
Ref Genes		TIF	XM_002282403	Vitis vinifera translation initiation factor 3 subunit G (LOC100251333)	11.2	Protein metabolism and modification.Protein biosynthesis	VVTU15763_at	Q9C5Y9 Initiation factor 3g related cluster
		TIF-GTP	XM_002271296	Vitis vinifera translation initiation factor eIF-2B subunit alpha (LOC100244672)	21	Unclassified	VVTU3178_at	Q3ECQ8 Protein At1g53880 related cluster
		ACT	AF369525.1	actin 2	25	Cytoskeleton organization and biogenesis	na	AF369525 Vitis vinifera Actin 2 (act2) mRNA
